# Supplementary material for: Reversible hydrocarbon/perfluorocarbon phase-switching of [Ru(bipy)3]2+ driven by supramolecular heteromeric fluorous carboxylate–carboxylic acid H-bond interactions
Source: Royal Society of Chemistry journal article supplement (doi:10.1039/c1cc12641e), 2011-01-01
Supplement: c1cc12641e.pdf [file c1cc12641e.pdf]

## Supplementary material

### **Reversible Hydrocarbon/Perfluorocarbon Phase-Switching of [Ru(bipy)<sub>3</sub>]<sup>2+</sup> Driven by Supramolecular Heteromeric Fluorous Carboxylate-Carboxylic Acid H-Bond Interactions**

**Rosenildo Corrêa da Costa, Thierry Buffeteau, André Del Guerzo, Nathan D. McClenaghan and Jean-Marc Vincent\***

*University Bordeaux 1, CNRS, Institut des Sciences Moléculaires, 33405 Talence Cedex, France.*

E-mail: [jm.vincent@ism.u-bordeaux1.fr](mailto:jm.vincent@ism.u-bordeaux1.fr)

**General remarks:** All reagents and solvents were obtained from commercial sources (highest available purity) and used as received except for dichloromethane which was distilled over CaH<sub>2</sub> prior to use. The fluoros acid RfCO<sub>2</sub>H was purchased from ABCR. NMR analysis were carried out on a spectrometer Bruker avanceII-300. The ESI-TOF mass spectra were recorded at the CESAMO analytical center (Institut des Sciences Moléculaires, Université Bordeaux 1) on a QSTAR Elite spectrometer from Applied Biosystem. Elemental analysis was performed by the Service Central d'Analyses, Vernaison, France. Results are expressed in weight percent. The infrared spectra of RfCO<sub>2</sub>H and complex **1**.(RfCO<sub>2</sub>H)<sub>2</sub> were recorded with a ThermoNicolet Nexus 670 FTIR spectrometer at a resolution of 4 cm<sup>-1</sup>, by coadding 50 scans. Samples were held in a fixed path length (50 μm) cell with BaF<sub>2</sub> windows. Spectra of the two compounds were measured in perfluorodecalin solvent at a concentration of about 50 mM. All infrared spectra were shown with solvent absorption subtracted out. Electronic absorption spectra were recorded with a Varian Cary 5000 spectrophotometer. Steady-state emission spectra were recorded with a Horiba Jobin-Yvon Fluorolog-3 fluorimeter fitted with Hamamatsu R928P, R2658P and H10330-45 detectors and exciting with a 450W Xe-lamp across a double monochromator, and were corrected for instrumental function. Luminescence decays were recorded in single-photon counting mode on the Fluorolog-3, with high frequency pulsed IBH nanoLEDs (λ<sub>exc</sub> = 460nm, FWHM = ca. 1.2 ns) as the excitation source. The luminescence quantum yield (Φ<sub>f</sub>) was calculated by using the equation Φ<sub>f</sub> = Φ<sub>r</sub>(I/I<sub>r</sub>)(A<sub>r</sub>/A)(η<sup>2</sup>/η<sub>r</sub><sup>2</sup>) in which r refers to the quantum yield reference, I is the integrated emission intensity, A is the absorbance at the excitation wavelength and η is the refractive index of the solvent. An optically dilute solution of Ru(bipy)<sub>3</sub>Cl<sub>2</sub> in air-equilibrated water (Φ<sub>f</sub> = 0.028).[ A. Juris, V. Balzani, F. Barigelletti, S. Campagna, P. Belser and A. von Zelewsky, Coord. Chem. Rev., 1998, 84, 85.] was used as the reference. Concerning kinetics: k<sub>r</sub> was estimated using equation 1 (Φ<sub>f</sub> = Φ<sub>isc</sub>.k<sub>r</sub>.τ<sub>av</sub>), where the average decay time τ<sub>av</sub> is defined as ΣB<sub>i</sub>τ<sub>i</sub>/ΣB<sub>i</sub> = 375 ns for the cited air-equilibrated solution. The proportions 1.3:1 correspond to B<sub>1</sub>:B<sub>2</sub>, with τ<sub>1</sub> = 166 ns and τ<sub>2</sub> = 788 ns resulting from a 3-exponential fitting (τ<sub>3</sub> = 16 ns). Similarly, on N<sub>2</sub> bubbling, decay times of τ<sub>1</sub> = 325 ns, τ<sub>2</sub> = 949 ns (B<sub>1</sub>:B<sub>2</sub> = 0.3:1), τ<sub>3</sub> = 12 ns and τ<sub>av</sub> = 642 ns were measured. The ratio of τ<sub>av</sub> (N<sub>2</sub>) / τ<sub>av</sub> (air) = 1.71 is in agreement with the ratio of quantum yields Φ<sub>f</sub> (N<sub>2</sub>) / Φ<sub>f</sub> (air) = 1.87.

$$\Phi_f = \Phi_{isc} k_r \tau_{av} \quad \text{eq. 1}$$

$$\frac{1}{\tau} = k_r + k_{nr} \quad \text{eq. 2}$$

### Synthesis of [Ru(bipy)<sub>3</sub>](CF<sub>3</sub>CF<sub>2</sub>CF<sub>2</sub>O[(CF<sub>3</sub>)CFCF<sub>2</sub>O]<sub>3</sub>(CF<sub>3</sub>)CFCO<sub>2</sub>)<sub>2</sub>, **1**:

Ag<sub>2</sub>CO<sub>3</sub> (0.129 g, 0.470 mmol) was added to a solution of C<sub>14</sub>F<sub>29</sub>O<sub>4</sub>CO<sub>2</sub>H (0.500 g, 0.603 mmol) in EtOH (5 mL) to give a greenish suspension which was stirred for 16h. The reaction mixture was filtered and the solvent evaporated to give C<sub>14</sub>F<sub>29</sub>O<sub>4</sub>CO<sub>2</sub>Ag as a clear viscous oil (0.524 mg).

A round-bottomed flask was charged with a solution of C<sub>14</sub>F<sub>19</sub>O<sub>4</sub>CO<sub>2</sub>Ag (0.500 g, 0.53 mmol) in EtOH (4.0 mL). Ru(Bipy)<sub>3</sub>Cl<sub>2</sub> (0.100 g, 0.134 mmol) was added in small portions under stirring to give an off-white precipitate. The mixture was further stirred for 30 minutes and the off-white precipitate was removed by filtration. The filtrate was transferred into a round-bottomed flask, protected from light and heated at 50 °C overnight. The orange mixture was filtered through a pad of celite and the solvent was removed to give an orange residue, which was washed abundantly with diethyl ether to give the product as a bright orange solid (0.2876 g, 97%).

FTIR (cm<sup>-1</sup>): 3440, 3080, 1698 (C=O), 1604, 1466, 1448, 1425, 1400-1050 (CF), 1033, 983, 807, 768, 746, 733, 659, 534; Anal. Calcd for C<sub>60</sub>H<sub>24</sub>F<sub>58</sub>N<sub>6</sub>O<sub>12</sub>Ru: C, 32.41; H, 1.09; N, 3.78; Ru, 4.54 Found: C, 31.70; H, 1.21; N, 3.94; Ru, 4.04; Cl < 200 ppm; ESI<sup>+</sup>-MS *m/z* (%): 1396.7 (100) [*M* - R<sub>f</sub>CO<sub>2</sub>]<sup>+</sup>; UV-visible (MeOH) [*λ*<sub>max</sub>, nm (ε, M<sup>-1</sup> cm<sup>-1</sup>): 449 (14500). <sup>1</sup>H NMR (300 MHz, CD<sub>2</sub>Cl<sub>2</sub>) δ ppm: 8.75 (d, *J* = 8.29 Hz, 6H), 7.99 (td, *J* = 7.82 Hz, 6H), 7.62 (dd, *J* = 5.65, 0.75 Hz, 6H), 7.30 – 7.38 (m, 6H). <sup>13</sup>C NMR (101 MHz, MeOD) δ ppm: 102.24, 102.52, 102.92, 104.86, 105.21, 105.62, 105.97, 114.50, 117.38, 117.65, 119.28, 119.58, 119.90, 120.23, 120.47, 122.43, 125.81, 129.08, 139.40, 152.76, 158.71, 162.02 (C=O).

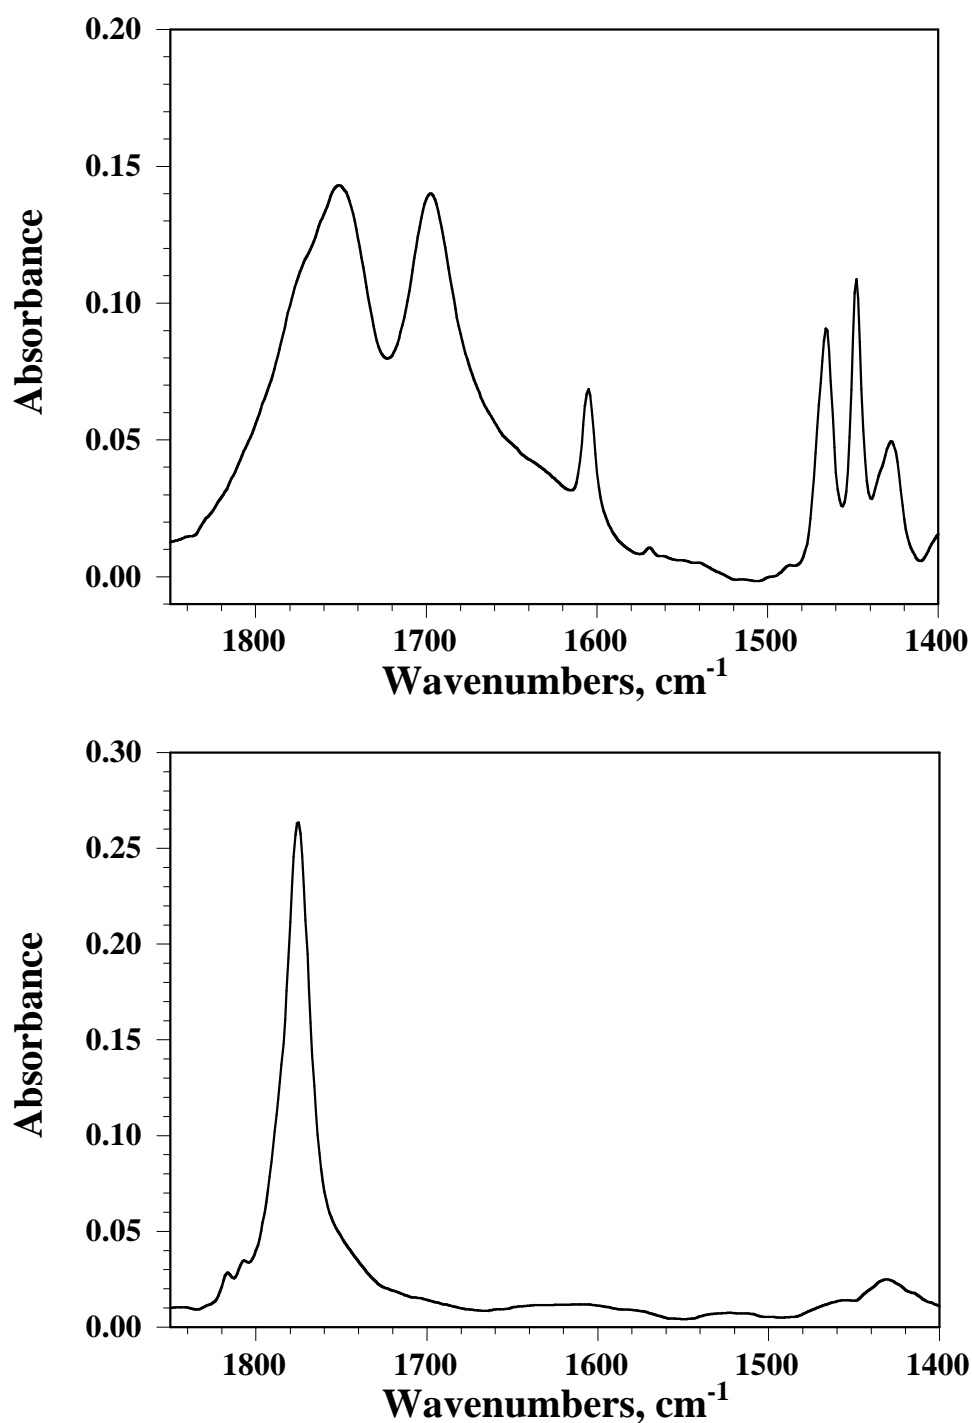

**Figure S1** IR spectrum of the perfluorodecalin solution (upper spectrum) resulting from a phase-switching experiment conducted with a DCM solution (0.250 mL) containing **1** (17.8 mg, 8  $\mu$ mol) and a perfluorodecalin solution (0.150 mL) containing R<sub>7</sub>CO<sub>2</sub>H (14.0 mg, 16.9  $\mu$ mol). The lower spectrum corresponds to the perfluorodecalin solution of R<sub>7</sub>CO<sub>2</sub>H before extraction.

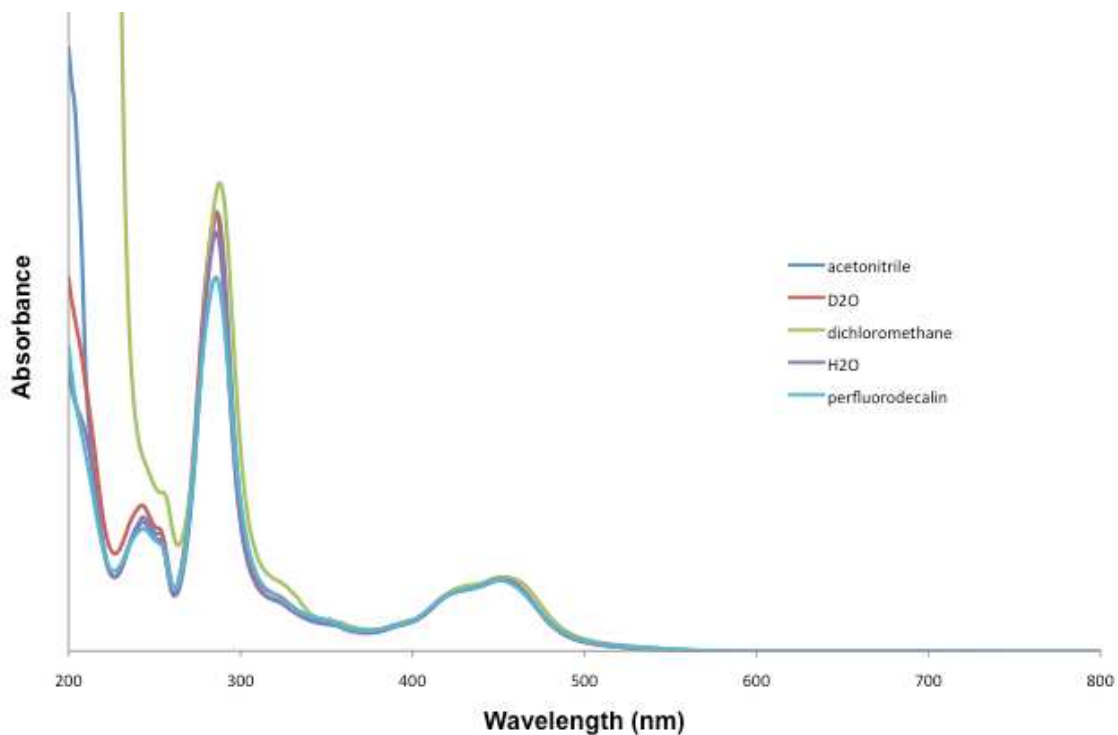

**Figure S2** Electronic absorption spectra of  $1.(RfCOOH)_2$  in PFD and  $1$  in DCM, ACN, D<sub>2</sub>O and H<sub>2</sub>O, normalised at 450nm.

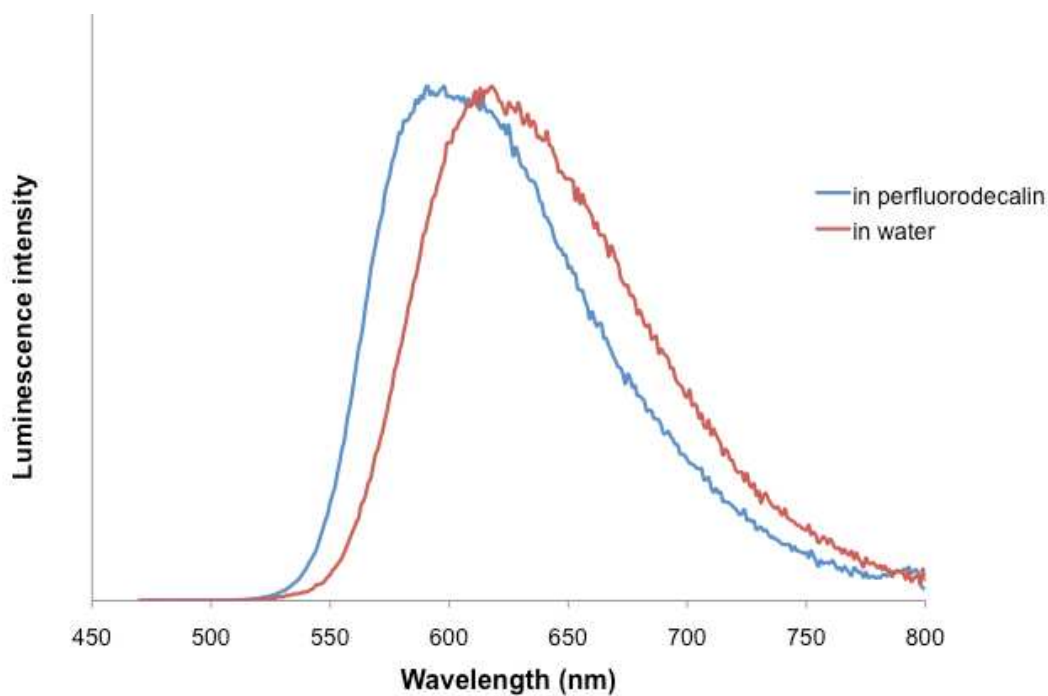

**Figure S3** Normalised emission spectra of Ru(bipy)<sub>3</sub>Cl<sub>2</sub> in H<sub>2</sub>O and  $1.(RfCOOH)_2$  in perfluorodecalin.  $\lambda_{exc} = 450nm$ .

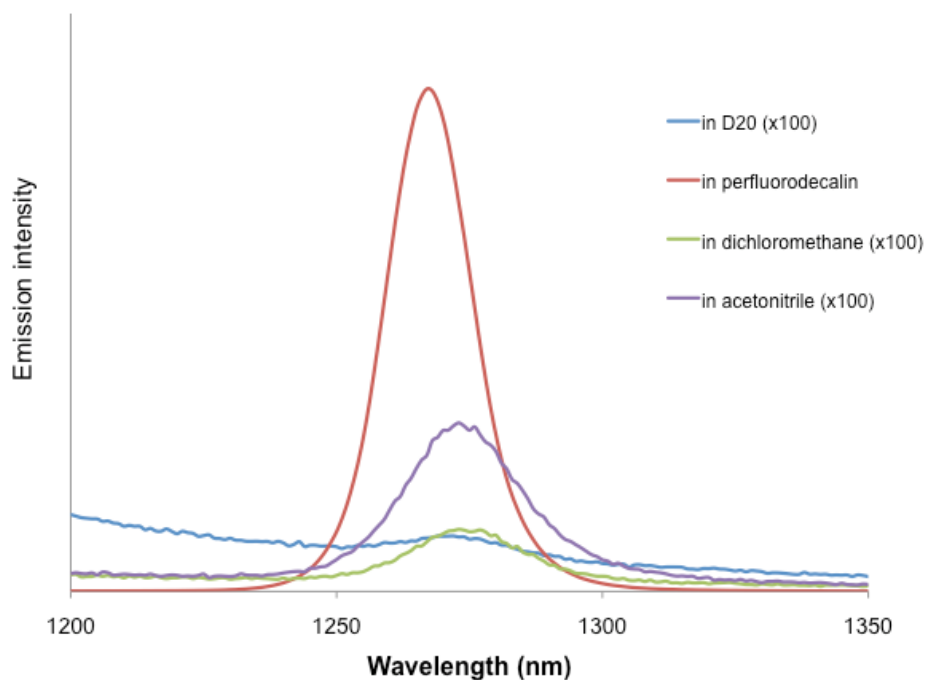

**Figure S4**  $^1\text{O}_2$  emission obtained using  $\text{Ru}(\text{bipy})_3\text{Cl}_2$  as photosensitizer in  $\text{D}_2\text{O}$ , **1** in DCM and acetonitrile and **1**. $(\text{RfCOOH})_2$  in perfluorodecalin, corrected for absorption.  $\lambda_{\text{exc}} = 450\text{nm}$ .

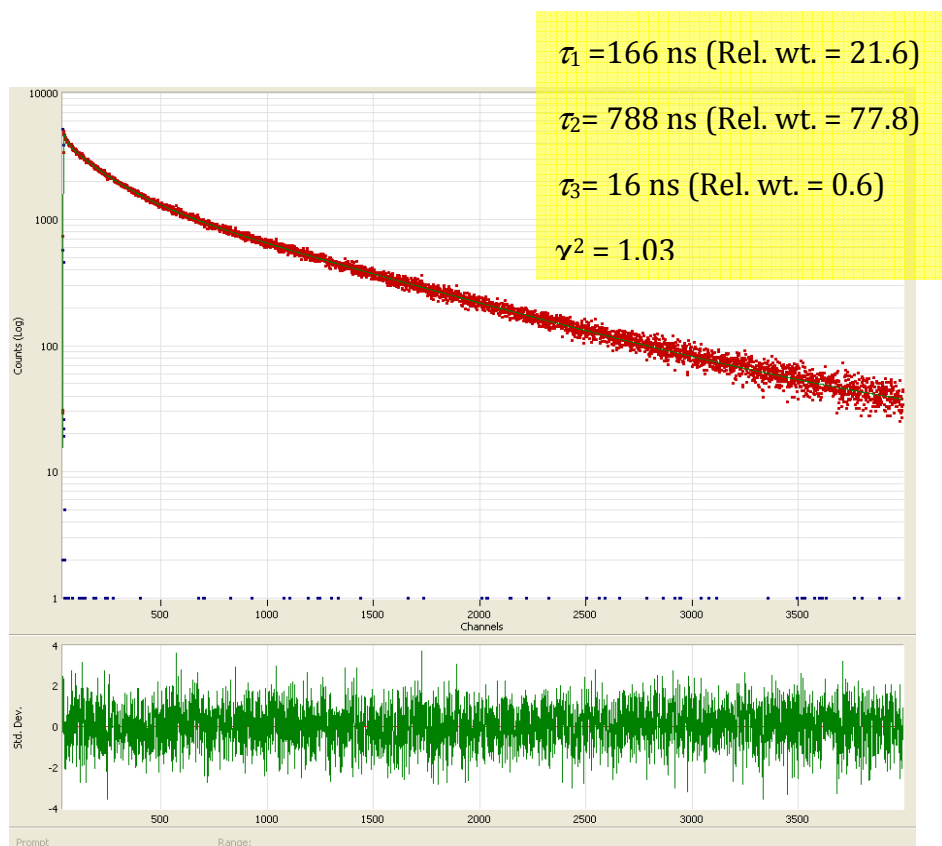

**Figure S5** Luminescence decay of **1**. $(\text{RfCOOH})_2$  at 600 nm.  $\lambda_{\text{exc}} = 460\text{nm}$ , concentration =  $1 \times 10^{-5} \text{ M}$ . Fitted to biexponential decay (a) and a triexponential decay (b).
